# Supplementary material
Source: MDPI journal article supplement (https://www.mdpi.com/2073-4344/14/5/320)
Supplement: s1 [file s1]

## Supporting Information

This PDF file Includes:

**Table S1.** The FAME composition of biodiesel produced from different feedstock.

**Table S2.** Experimental liquid–liquid equilibrium data for the ternary systems containing waste cooking oil biodiesel + methanol + glycerol at 303.15 K.

**Table S3.** liquid–liquid equilibria data for the ternary systems containing waste oil biodiesel + methanol + glycerol at 313.15 K.

**Table S4.** Experimental liquid–liquid equilibria data for the ternary systems containing waste oil biodiesel + methanol + glycerol at 323.15 K.

**Table S1.** The FAME composition of biodiesel produced from different feedstock.

| Structure of<br>Fatty acid<br>methyl ester | Composition( wt%) |             |                    |              |                |                  |                |             |              |              |              |
|--------------------------------------------|-------------------|-------------|--------------------|--------------|----------------|------------------|----------------|-------------|--------------|--------------|--------------|
|                                            | Sunflower<br>oil  | Palm<br>oil | Cotton<br>seed oil | Waste<br>oil | Seasame<br>oil | Sunflower<br>oil | Soybean<br>oil | Corn<br>oil | Canola<br>oi | Olive<br>oil | Salad<br>oil |
| C14:0                                      | 0.06              | 1.44        | 1.28               | 1.94         | 0.19           | 0.14             | 0.19           | 0.06        | 0.33         | 0.00         | 0.10         |
| C16:0                                      | 10.87             | 26.95       | 24.04              | 16.83        | 11.42          | 7.91             | 11.09          | 11.96       | 9.35         | 11.60        | 6.90         |
| C18:0                                      | 5.17              | 6.40        | 4.94               | 4.94         | 5.59           | 5.83             | 5.50           | 3.45        | 3.51         | 1.00         | 0.10         |
| C20:0                                      | 2.55              | 0.72        | 0.41               | 0.49         | 0.65           | 0.47             | 0.60           | 0.91        | 0.79         | 3.10         | 4.00         |
| C22:0                                      | 4.84              | 0.21        | 0.00               | 0.40         | 0.64           | 1.21             | 0.69           | 0.27        | 0.49         | 75.00        | 19.00        |
| C24:0                                      | 2.47              | 0.14        | 0.00               | 0            | 0.21           | 0.38             | 0.22           | 0.33        | 0.22         | 7.80         | 69.10        |
| Saturated fatty<br>acid methyl ester       | 25.96             | 28.39       | 30.67              | 24.14        | 18.70          | 15.94            | 18.29          | 16.98       | 14.69        | 98.50        | 99.20        |
| C16:1                                      | 0.16              | 0.42        | 2.15               | 2.03         | 0.22           | 0.19             | 0.26           | 0.29        | 0.44         | 0.60         | 0.30         |
| C18:1                                      | 38.87             | 42.13       | 38.87              | 45.07        | 29.70          | 27.90            | 28.56          | 33.20       | 40.33        | 0.30         | 0.30         |
| C20:1                                      | 1.63              | 0.34        | 0.61               | 1.02         | 0.45           | 0.32             | 0.41           | 0.66        | 3.05         | 0.00         | 0.00         |
| C22:1                                      | 0.11              | 0.15        | 1.10               | 0.00         | 0              | 0                | 0.11           | 0.84        | 6.95         | 0.10         | 0.00         |
| C18:2                                      | 32.09             | 18.20       | 23.32              | 24.82        | 41.30          | 52.96            | 42.95          | 45.8        | 25.25        | 0.00         | 0.00         |
| C18:3                                      | 0.11              | 1.59        | 1.78               | 1.87         | 7.12           | 0.51             | 7.74           | 1.23        | 7.38         | 0.50         | 0.00         |
| Unsaturated<br>fatty acid methyl<br>ester  | 72.97             | 62.83       | 67.83              | 74.81        | 78.79          | 81.88            | 80.03          | 82.02       | 83.40        | 1.50         | 0.60         |



**Table S2.** Experimental liquid–liquid equilibrium data for the ternary systems containing waste cooking oil biodiesel + methanol + glycerol at 303.15 K.

| Temperature<br>(K ) | Raw material composition |        |        | Phase equilibrium data |        |        |                     |        |        |
|---------------------|--------------------------|--------|--------|------------------------|--------|--------|---------------------|--------|--------|
|                     | (%)                      |        |        | Biodiesel rich phase   |        |        | Glycerol rich phase |        |        |
|                     | W1                       | W2     | W3     | W1                     | W2     | W3     | W1                  | W2     | W3     |
| 303.15              | 0.2795                   | 0.6203 | 0.1002 | 0.0004                 | 0.9770 | 0.0226 | 0.8018              | 0.0015 | 0.1967 |
|                     | 0.2216                   | 0.5791 | 0.1993 | 0.0009                 | 0.9347 | 0.0644 | 0.5866              | 0.0064 | 0.4069 |
|                     | 0.2006                   | 0.4993 | 0.3001 | 0.0012                 | 0.9089 | 0.0899 | 0.4753              | 0.0098 | 0.5149 |
|                     | 0.1902                   | 0.4103 | 0.3995 | 0.0025                 | 0.9004 | 0.0971 | 0.3914              | 0.0163 | 0.5923 |
|                     | 0.1507                   | 0.3495 | 0.4998 | 0.0010                 | 0.8841 | 0.1149 | 0.2623              | 0.0295 | 0.7082 |

w<sub>1</sub> glycerol, w<sub>2</sub>, waste oil biodiesel, w<sub>3</sub> methanol.

**Table S3.** liquid–liquid equilibria data for the ternary systems containing waste oil biodiesel + methanol + glycerol at 313.15 K.

| Temperature<br>(K ) | Raw material composition |        |        | Phase equilibrium data |        |        |                     |        |        |
|---------------------|--------------------------|--------|--------|------------------------|--------|--------|---------------------|--------|--------|
|                     | (%)                      |        |        | Biodiesel rich phase   |        |        | Glycerol rich phase |        |        |
|                     | W1                       | W2     | W3     | W1                     | W2     | W3     | W1                  | W2     | W3     |
| 313.15              | 0.2802                   | 0.6195 | 0.1003 | 0.0011                 | 0.9786 | 0.0203 | 0.8010              | 0.0042 | 0.1948 |
|                     | 0.2203                   | 0.5783 | 0.2014 | 0.0011                 | 0.9509 | 0.0480 | 0.5903              | 0.0088 | 0.4009 |
|                     | 0.2024                   | 0.4985 | 0.2991 | 0.0017                 | 0.9278 | 0.0705 | 0.4551              | 0.0120 | 0.5329 |
|                     | 0.1908                   | 0.4047 | 0.4044 | 0.0022                 | 0.9078 | 0.0900 | 0.3662              | 0.0186 | 0.6152 |
|                     | 0.1502                   | 0.3506 | 0.4992 | 0.0028                 | 0.1267 | 0.8705 | 0.2841              | 0.0337 | 0.6802 |

w<sub>1</sub> glycerol, w<sub>2</sub>, waste oil biodiesel, w<sub>3</sub> methanol.

**Table S4.** Experimental liquid–liquid equilibria data for the ternary systems containing waste oil biodiesel + methanol + glycerol at 323.15 K.

| Temperature<br>(K ) | Raw material composition |        |        | Phase equilibrium data |        |        |                     |        |        |
|---------------------|--------------------------|--------|--------|------------------------|--------|--------|---------------------|--------|--------|
|                     | (%)                      |        |        | Biodiesel rich phase   |        |        | Glycerol rich phase |        |        |
|                     | W1                       | W2     | W3     | W1                     | W2     | W3     | W1                  | W2     | W3     |
| 323.15              | 0.2807                   | 0.6193 | 0.1000 | 0.0021                 | 0.9683 | 0.0296 | 0.8047              | 0.0088 | 0.1865 |
|                     | 0.2204                   | 0.5796 | 0.1999 | 0.0039                 | 0.9392 | 0.0568 | 0.6047              | 0.0181 | 0.3772 |
|                     | 0.1967                   | 0.4892 | 0.3141 | 0.0065                 | 0.8947 | 0.0989 | 0.4669              | 0.0238 | 0.5092 |
|                     | 0.1893                   | 0.4105 | 0.4001 | 0.0080                 | 0.8675 | 0.1244 | 0.3984              | 0.0272 | 0.5744 |
|                     | 0.1515                   | 0.3498 | 0.4987 | 0.0099                 | 0.8498 | 0.1403 | 0.3194              | 0.0363 | 0.6443 |

w<sub>1</sub> glycerol, w<sub>2</sub>, waste oil biodiesel, w<sub>3</sub> methanol.
